# Supplementary material for: Association of sputum microbiota profiles with severity of community-acquired pneumonia in children
Source: PubMed Central journal article supplement (PMC4939047; doi:10.1186/s12879-016-1670-4), 2016-07-08
Supplement: 12879_2016_1670_MOESM1_ESM.pdf [file 12879_2016_1670_MOESM1_ESM.pdf]

Supplemental Table 1. Value for the top quartile (75<sup>th</sup> percentile) for frequency distributions of taxa stratified by subject age for sputum and nasopharyngeal/oropharyngeal (NP/OP) samples<sup>a</sup>.

| OTU                              | Age < 5 years |       | Age ≥ 5 years |       |
|----------------------------------|---------------|-------|---------------|-------|
|                                  | Sputum        | NP/OP | Sputum        | NP/OP |
| <i>Actinomyces</i> sp.           | 1.49          | 3.30  | 3.02          | 4.17  |
| <i>Atopobium</i> sp.             | 0.17          | 0.93  | 0.58          | 1.70  |
| <i>Bacteroidales</i> order       | 1.30          | 1.04  | 2.82          | 2.38  |
| <i>Bacteroidetes</i> phylum      | 2.45          | 1.00  | 1.61          | 0.65  |
| <i>Corynebacterium</i> sp.       | 0.49          | 1.18  | 0.59          | 1.34  |
| <i>Dolosigranulum</i> sp.        | 0.55          | 1.14  | 0.00          | 0.96  |
| <i>Fusobacterium</i> sp.         | 3.07          | 1.25  | 6.44          | 2.28  |
| <i>Gemella</i> sp.               | 1.32          | 1.88  | 2.02          | 1.61  |
| <i>Haemophilus</i> sp.           | 10.63         | 1.68  | 1.32          | 0.17  |
| <i>Lactobacillales</i> order     | 0.74          | 2.33  | 1.91          | 2.03  |
| <i>Leptotrichia</i> sp.          | 0.90          | 0.84  | 2.99          | 1.27  |
| <i>Leptotrichiaceae</i> family   | 0.86          | 0.66  | 0.96          | 0.45  |
| <i>Moraxella</i> sp.             | 27.89         | 5.77  | 0.19          | 1.07  |
| <i>Mycoplasma</i> sp.            | 0.00          | 0.00  | 0.10          | 0.02  |
| <i>Neisseria</i> sp.             | 3.06          | 2.03  | 4.50          | 1.28  |
| <i>Pasteurellaceae</i> family    | 10.01         | 3.52  | 8.79          | 1.91  |
| <i>Porphyromonadaceae</i> family | 1.98          | 1.35  | 3.70          | 1.97  |
| <i>Prevotella</i> sp.            | 9.57          | 13.50 | 21.04         | 21.69 |
| <i>Rothia</i> sp.                | 1.78          | 8.75  | 3.32          | 4.17  |
| <i>Streptococcus</i> sp.         | 38.65         | 46.89 | 27.32         | 30.69 |
| <i>Veillonella</i> sp.           | 5.07          | 10.92 | 10.55         | 12.58 |
| Other                            | 12.10         | 12.04 | 18.92         | 23.19 |

<sup>a</sup>Table values represent a percent, e.g., the relative abundance of *Veillonella* sp. was at least 5.07% of the sample in approximately 25% of the sputum samples for children 6 months to <5 years of age.

Supplemental Table 2. Diagnostic tests for detection of respiratory viruses and bacteria [n (%)] in children (n=383) 6 months to <18 years of age hospitalized with community-acquired pneumonia by age group

| Characteristic            | N (%)      | Age group                |                    | P value |
|---------------------------|------------|--------------------------|--------------------|---------|
|                           |            | 6 months to <5 years (%) | 5 to <18 years (%) |         |
| <b>Total</b>              | 383        | 263(68.7)                | 120(31.3)          |         |
| Respiratory viruses       |            |                          |                    |         |
| Rhinovirus                | 148 (38.6) | 33.8                     | 49.2               | 0.004   |
| RSV                       | 123 (32.1) | 41.8                     | 10.8               | <0.0001 |
| Adenovirus                | 61 (15.9)  | 21.3                     | 4.2                | <0.0001 |
| Human metapneumovirus     | 26 (7.0)   | 9.1                      | 1.7                | 0.007   |
| Coronavirus               | 24 (6.3)   | 7.6                      | 3.3                | 0.11    |
| Parainfluenza types 1-3   | 27 (7.0)   | 8.4                      | 4.2                | 0.14    |
| Influenza A and B         | 17 (4.4)   | 3.8                      | 5.8                | 0.37    |
| Bacteria diagnostic tests |            |                          |                    |         |
| <i>M. pneumoniae</i>      | 14 (3.7)   | 1.5                      | 8.3                | 0.001   |
| <i>S. pneumoniae</i>      | 9 (2.4)    | 3.4                      | 0.0                | 0.06    |
| <i>H. influenzae</i>      | 1 (0.3)    | 0.4                      | 0.0                | --      |
| Bacteria sputum culture   |            |                          |                    |         |
| <i>S. pneumoniae</i>      | 64 (16.7)  | 22.4                     | 4.2                | <0.0001 |
| <i>H. influenzae</i>      | 47 (12.3)  | 16.0                     | 4.2                | 0.001   |
| <i>M. cattharalis</i>     | 65 (17.0)  | 23.9                     | 1.7                | <0.0001 |
| <i>S. aureus</i>          | 68 (17.8)  | 17.1                     | 19.2               | 0.63    |

Supplemental Table 3. Adjusted associations between sputum culture results from children 6 months to <5 years (n=263) or 5 to <18 years (n=120), hospitalized with community-acquired pneumonia and length of stay (LOS) or intensive care unit (ICU) admission.

| Characteristic                 | LOS $\geq$ 4 days<br>OR (95% CI) | ICU admission<br>OR (95% CI) |
|--------------------------------|----------------------------------|------------------------------|
| <b>6 months to &lt;5 years</b> |                                  |                              |
| <i>S. pneumoniae</i>           | 0.97 (0.49, 1.93)                | 0.56 (0.18, 1.74)            |
| <i>H. influenzae</i>           | 1.97 (0.97, 4.02)                | 1.02 (0.11, 0.85)            |
| <i>M. cattharalis</i>          | 1.09 (0.57, 2.11)                | 0.57 (0.15, 0.46)            |
| <i>S. aureus</i>               | 2.48 (1.25, 4.90)                | 1.52 (0.56, 4.15)            |
| <b>5 to &lt;18 years</b>       |                                  |                              |
| <i>S. aureus</i>               | 1.28 (0.46, 3.56)                | 1.81 (0.63, 5.20)            |

Supplemental Table 4. Rotated factor patterns from principal components analysis (PCA) using proportions of taxa in nasopharyngeal/oropharyngeal (NP/OP) samples from children 6 months to <5 years (n=263) or 5 to <18 years (n=120). Taxa of interest for each factor are highlighted.

| Taxa                               | Factor 1 | Factor 2 | Factor 3 |
|------------------------------------|----------|----------|----------|
| <b>Age 6 months to &lt;5 years</b> |          |          |          |
| <i>Prevotella</i> sp.              | 0.75     | 0.16     | -0.14    |
| <i>Veillonella</i> sp.             | 0.72     | -0.20    | -0.30    |
| <i>Actinomyces</i> sp.             | 0.70     | -0.18    | -0.17    |
| <i>Leptotrichiaceae</i> family     | 0.69     | 0.21     | 0.08     |
| <i>Atopobium</i> sp.               | 0.59     | -0.27    | -0.16    |
| <i>Bacteroidales</i> order         | 0.32     | 0.67     | -0.09    |
| <i>Bacteroidetes</i> phylum        | -0.15    | 0.63     | -0.15    |
| <i>Fusobacterium</i> sp.           | 0.34     | 0.58     | 0.20     |
| <i>Porphyromonadaceae</i> family   | -0.13    | 0.47     | -0.12    |
| <i>Neisseria</i> sp.               | -0.10    | 0.45     | -0.06    |
| <i>Corynebacterium</i> sp.         | -0.09    | -0.08    | 0.75     |
| <i>Dolosigranulum</i> sp.          | -0.09    | -0.09    | 0.83     |
| <i>Moraxella</i> sp.               | -0.24    | -0.12    | 0.53     |
| <b>Age 5 to &lt;18 years</b>       |          |          |          |
| <i>Prevotella</i> sp.              | 0.74     | -0.29    |          |
| <i>Veillonella</i> sp.             | 0.71     | -0.16    |          |
| <i>Atopobium</i> sp.               | 0.65     | -0.31    |          |
| <i>Actinomyces</i> sp.             | 0.52     | -0.07    |          |
| <i>Bacteroidales</i> order         | 0.47     | -0.18    |          |
| <i>Corynebacterium</i> sp.         | -0.43    | -0.24    |          |
| <i>Moraxella</i> sp.               | -0.53    | -0.29    |          |
| <i>Dolosigranulum</i> sp.          | -0.61    | -0.35    |          |
| <i>Pasteurellaceae</i> family      | -0.13    | 0.76     |          |
| <i>Neisseria</i> sp.               | -0.07    | 0.66     |          |
| <i>Gemella</i> sp.                 | 0.03     | 0.54     |          |
| <i>Haemophilus</i> sp.             | -0.07    | 0.53     |          |
