# Supplementary material for: Association of sputum microbiota profiles with severity of community-acquired pneumonia in children
Source: PubMed Central journal article supplement (PMC4939047; doi:10.1186/s12879-016-1670-4), 2016-07-08

**Supplemental Figure 1.** Proportion of children with a given dominant bacterial taxon

- *Streptococcus* sp.
- *Haemophilus* sp.
- *Pasteurellaceae* family
- *Fusobacterium* sp.
- *Corynebacterium* sp.
- *Leptotrichia* sp.
- *Rothia* sp.
- *Actinomyces* sp.
- *Bacteroidetes* phylum
- *Moraxella* sp.
- *Prevotella* sp.
- *Neisseria* sp.
- *Veillonella* sp.
- *Dolosigranulum* sp.
- *Mycoplasma* sp.
- *Porphyromonadaceae* family
- *Gemella* sp.
- *Rhodanobacter* sp.

**SPUTUM < 5**

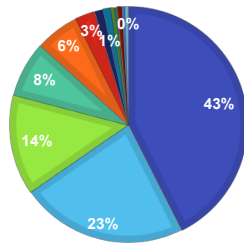

**SPUTUM 5+**

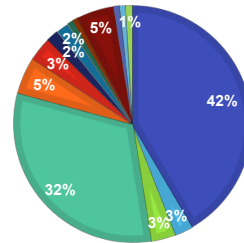

**NP/OP < 5**

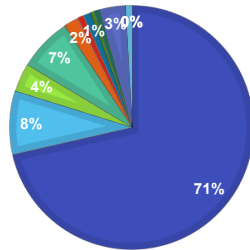

**NP/OP 5+**

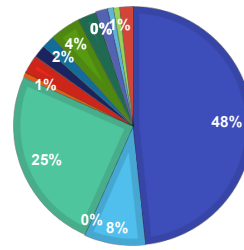

Supplement: 12879_2016_1670_MOESM2_ESM.pdf [file 12879_2016_1670_MOESM2_ESM.pdf]
